# Supplementary material for: Thermosensitive Polymer Blend Composed of Poloxamer 407, Poloxamer 188 and Polycarbophil for the Use as Mucoadhesive In Situ Gel
Source: MDPI journal article supplement (doi:10.3390/polym14091836), 2022-04-29
Supplement: s1 [file s1]

# Supplementary Material: Thermosensitive Polymer Blend Composed of Poloxamer 407, Poloxamer 188 and Polycarbophil for the Use as Mucoadhesive In Situ Gel

Namon Hirun, Pakorn Kraisit and Vimon Tantishaiyakul

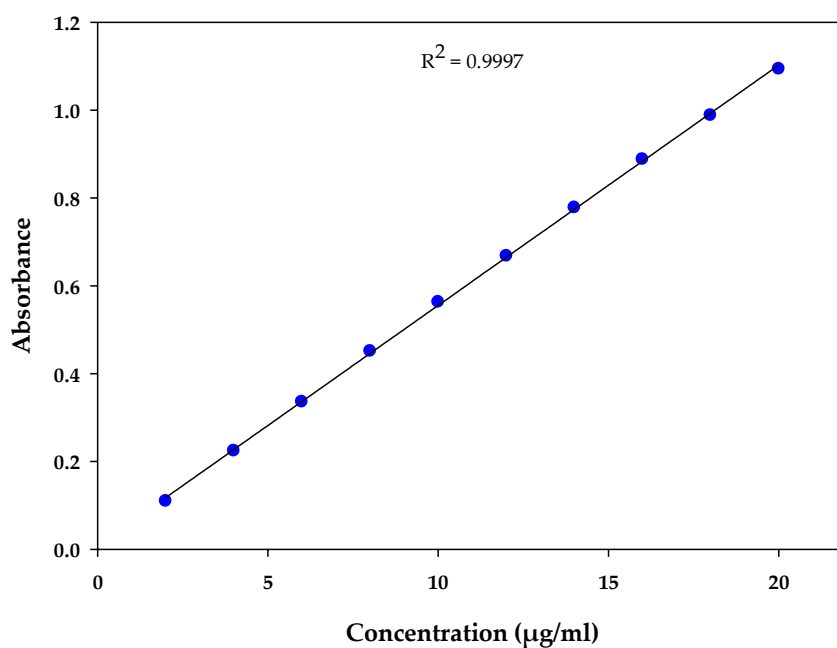

Figure S1. Calibration curve of metronidazole.
